# Supplementary material for: Anti‐Inflammatory Effects of Fermented Bark of Acanthopanax sessiliflorus and Its Isolated Compounds on Lipopolysaccharide‐Treated RAW 264.7 Macrophage Cells
Source: Hindawi journal article supplement (doi:10.1155/2020/6749425), 2020-01-01
Supplement: f1 [file 6749425.f1.pdf]

# Evidence-Based Complementary and Alternative Medicine

## Anti-inflammatory effects of fermented bark of *Acanthopanax sessiliflorus* and its isolated compounds on lipopolysaccharide-treated RAW 264.7 macrophage cells

Min Ji Kim<sup>1</sup>, Hye Soo Wang<sup>1</sup>, and Min Won Lee<sup>1</sup>

<sup>1</sup>Laboratory of Pharmacognosy and Natural Product derived Medicine, College of Pharmacy, Chung-Ang University, Seoul 06974, Korea

Correspondence should be addressed to Min Won Lee; mwlee@cau.ac.kr

### Supplementary Materials

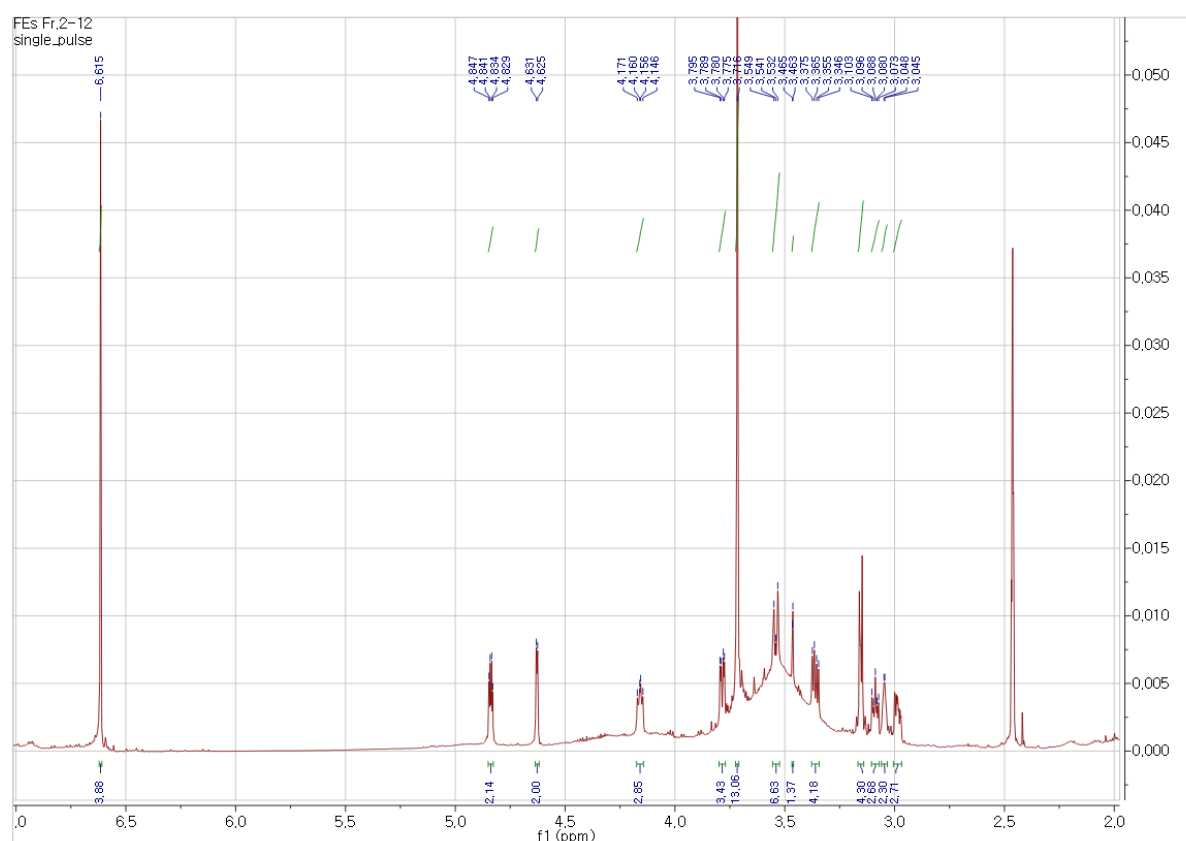

Figure S1-1: <sup>1</sup>H-NMR spectrum of compound **1** (600 MHz, DMSO-D<sub>2</sub>O)

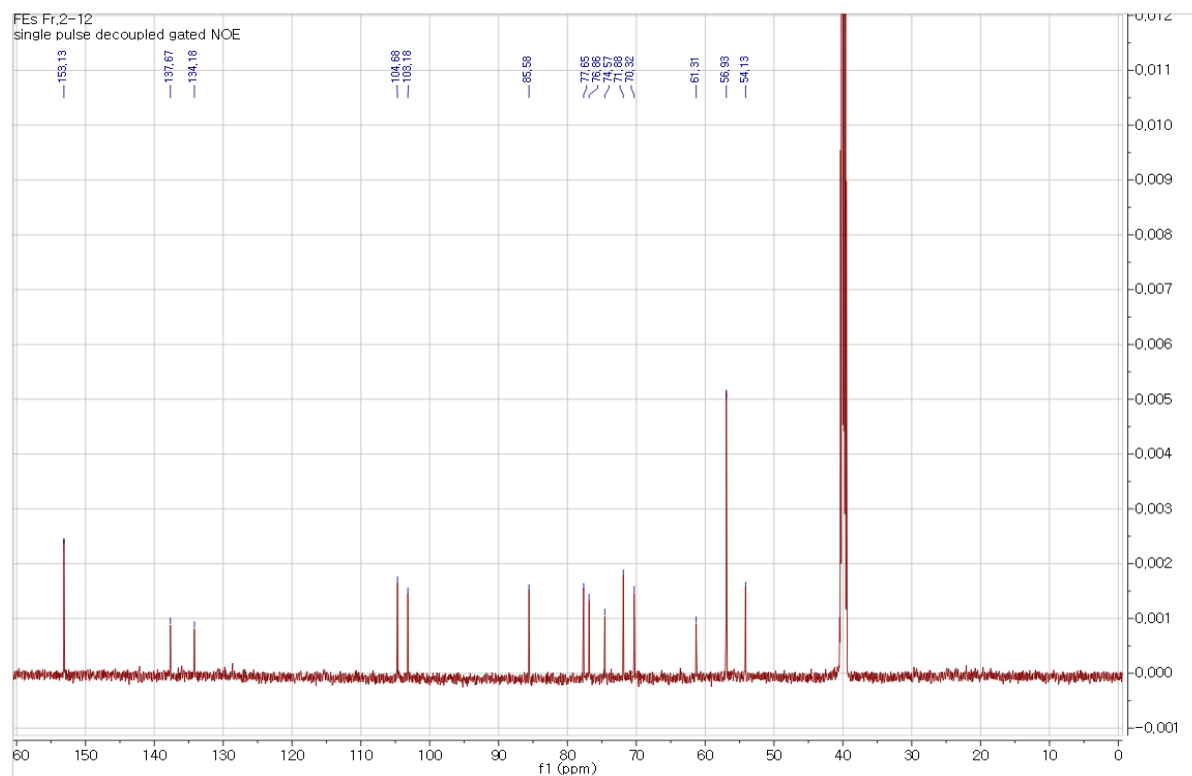Figure S1-2:  $^{13}\text{C}$ -NMR spectrum of compound **1** (150 MHz, DMSO+D<sub>2</sub>O)12  
13  
14

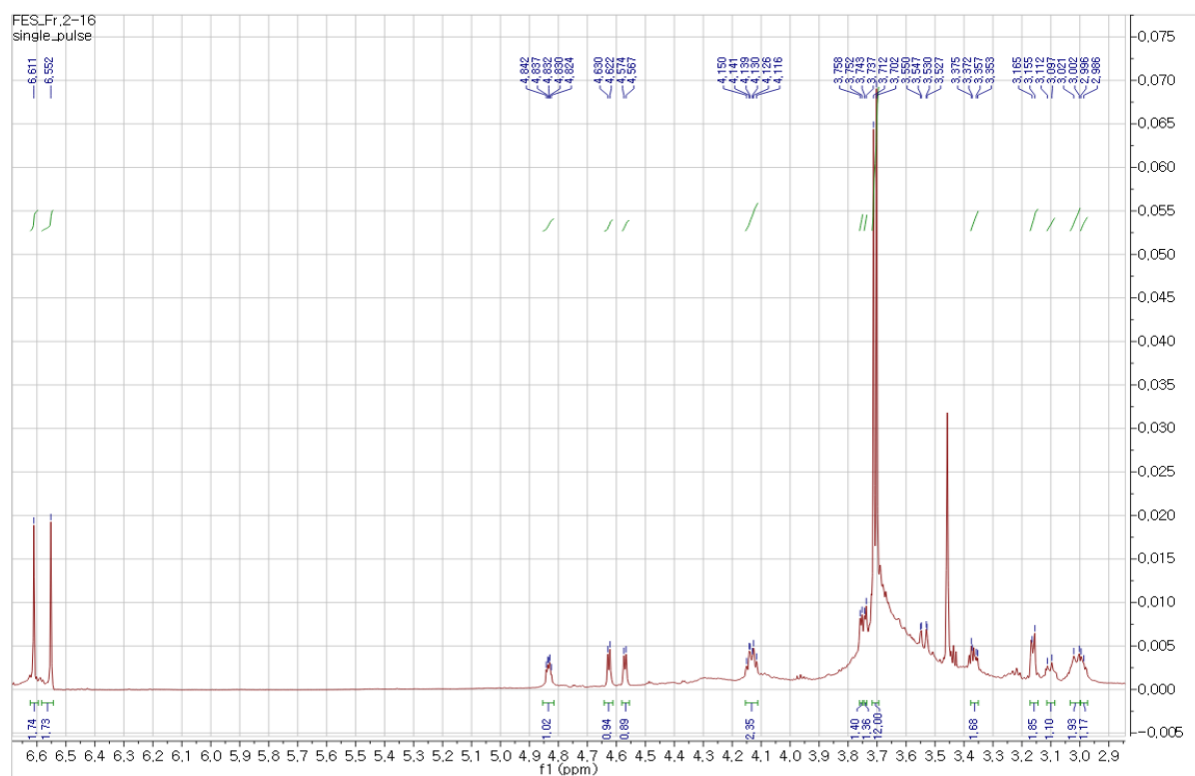Figure S2-1:  $^1\text{H}$ -NMR spectrum of compound **2** (600 MHz, DMSO+D<sub>2</sub>O)

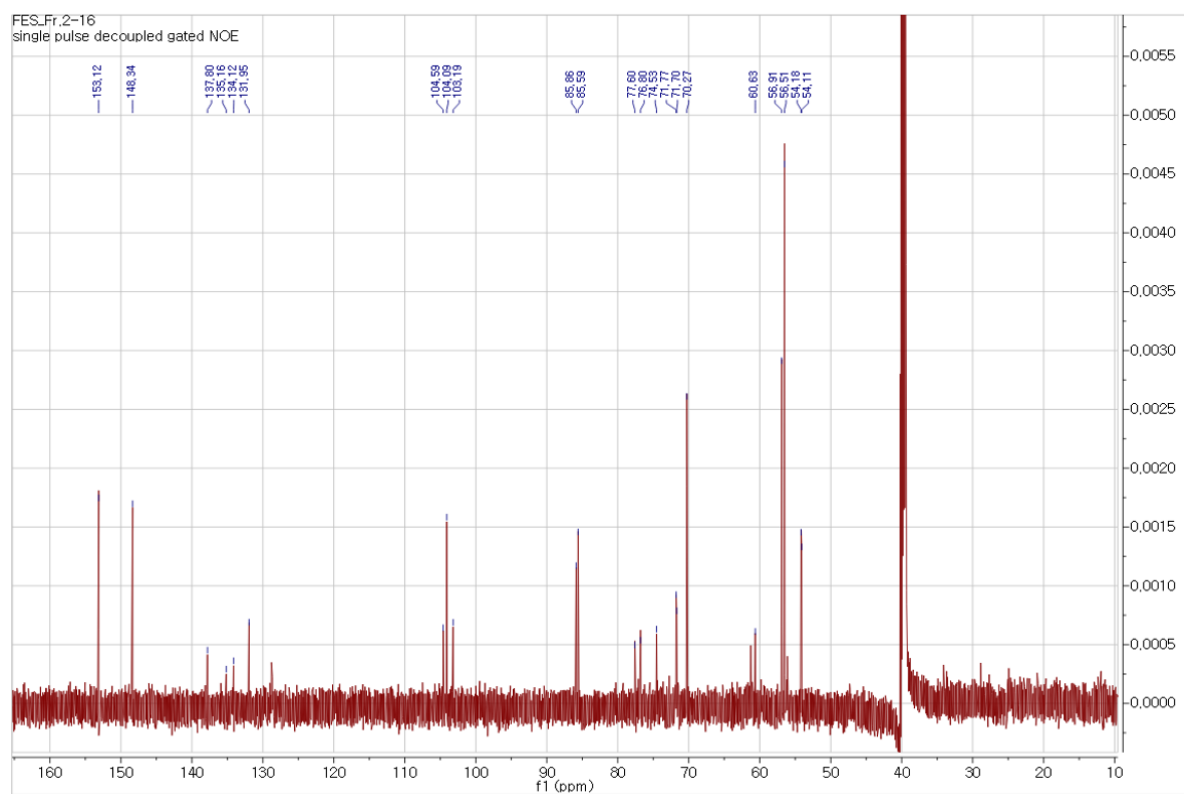

Figure S2-2:  $^{13}\text{C}$ -NMR spectrum of compound **2** (150 MHz, DMSO+D<sub>2</sub>O)

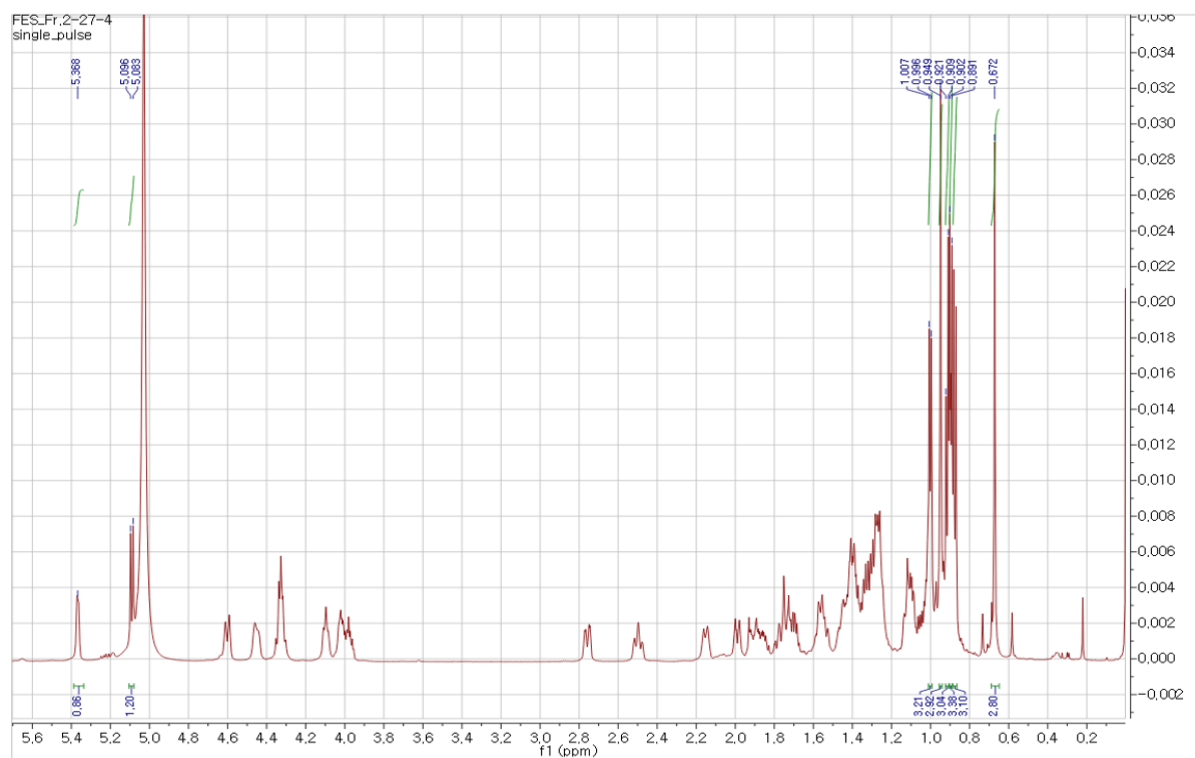

21  
22  
23

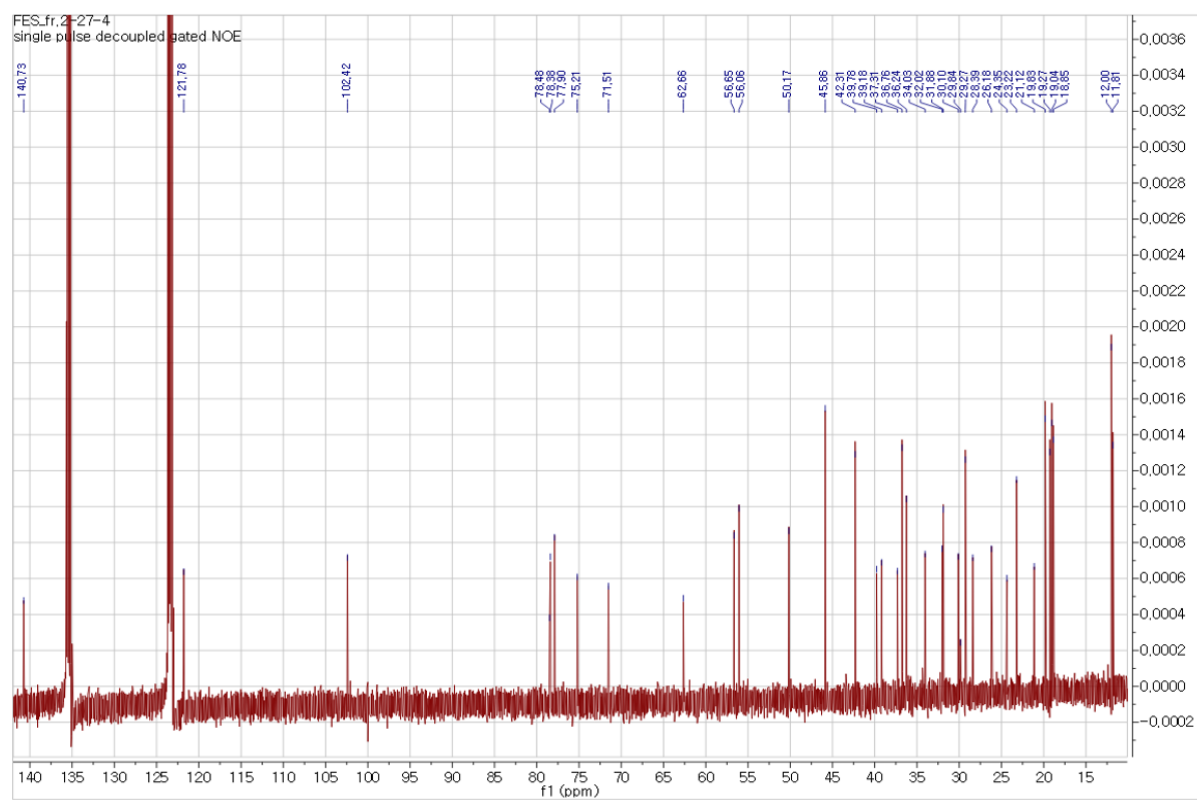

Figure S3-2:  $^{13}\text{C}$ -NMR spectrum of compound **3** (150 MHz, pyridine- $d_5$ )

24  
25  
26

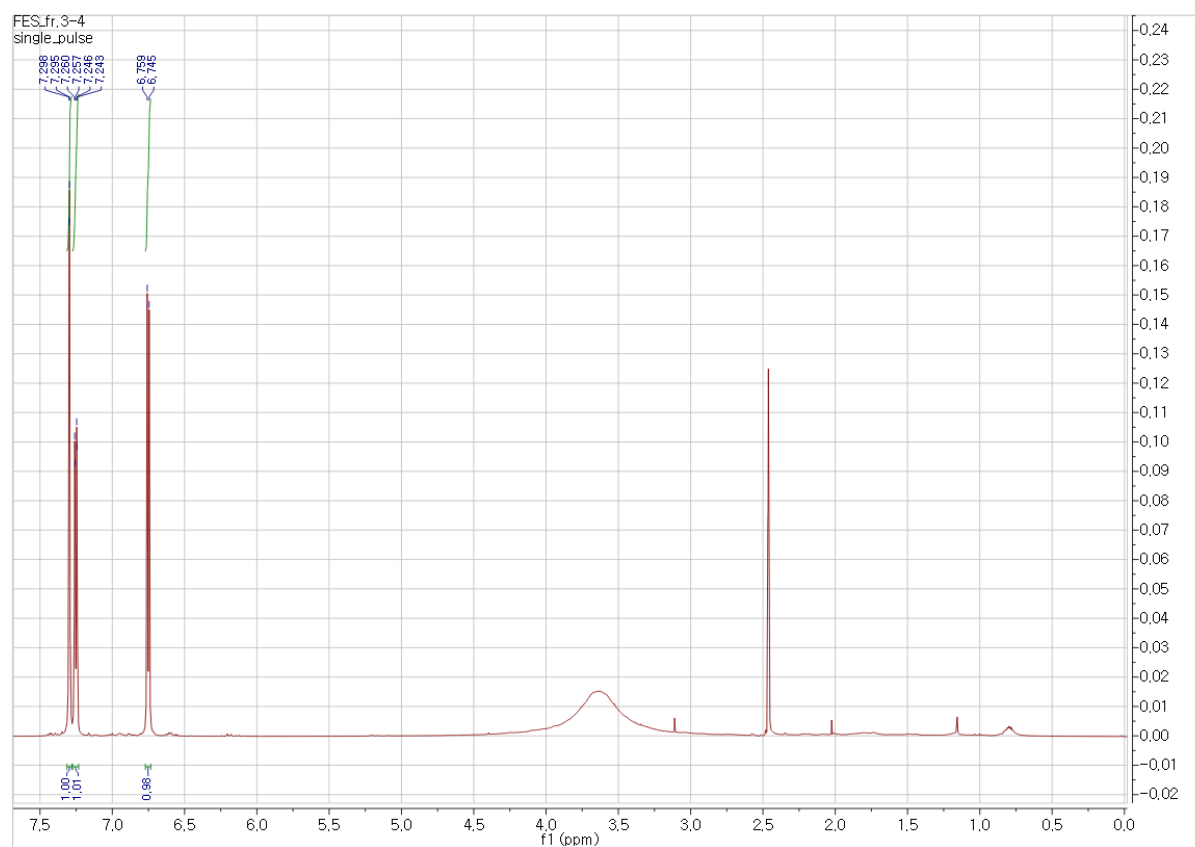

Figure S4-1:  $^1\text{H}$ -NMR spectrum of compound **4** (600 MHz, DMSO+D<sub>2</sub>O)

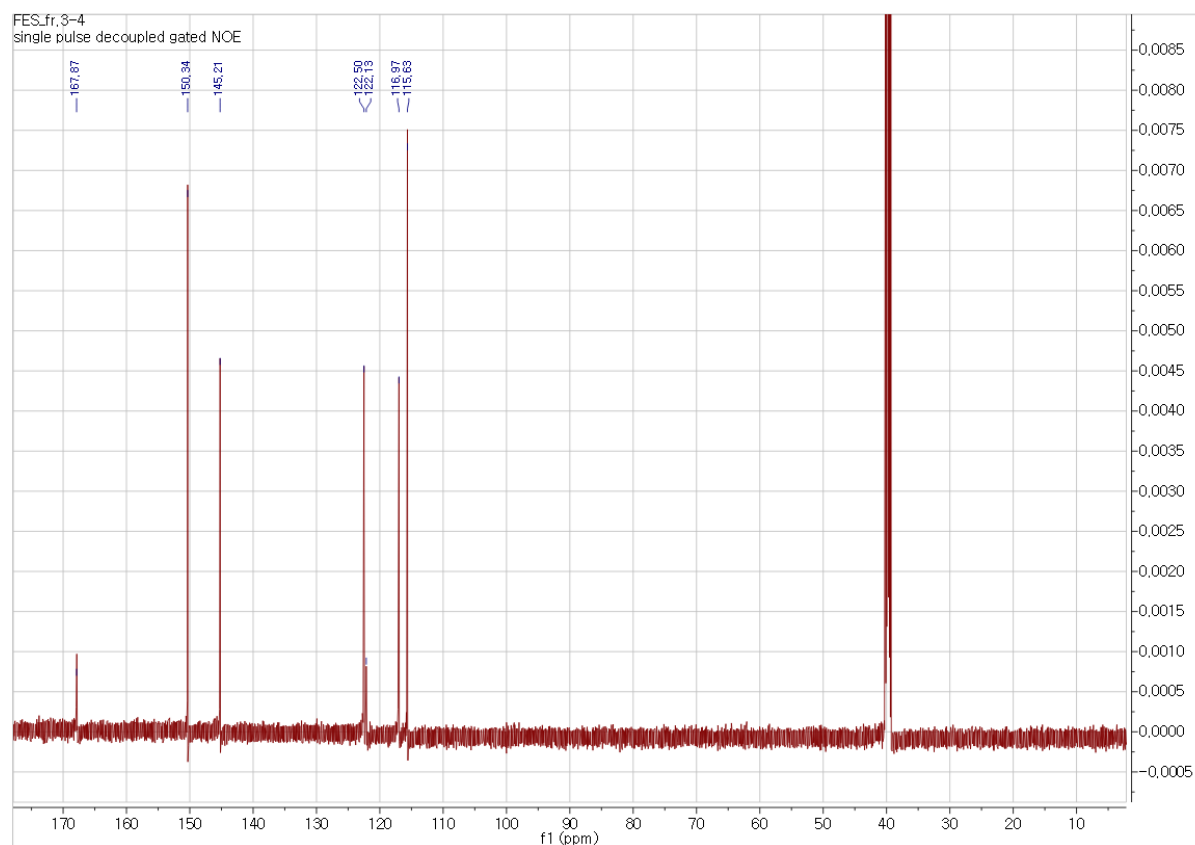

Figure S4-2:  $^{13}\text{C}$ -NMR spectrum of compound **4** (150 MHz, DMSO- $\text{D}_2\text{O}$ )



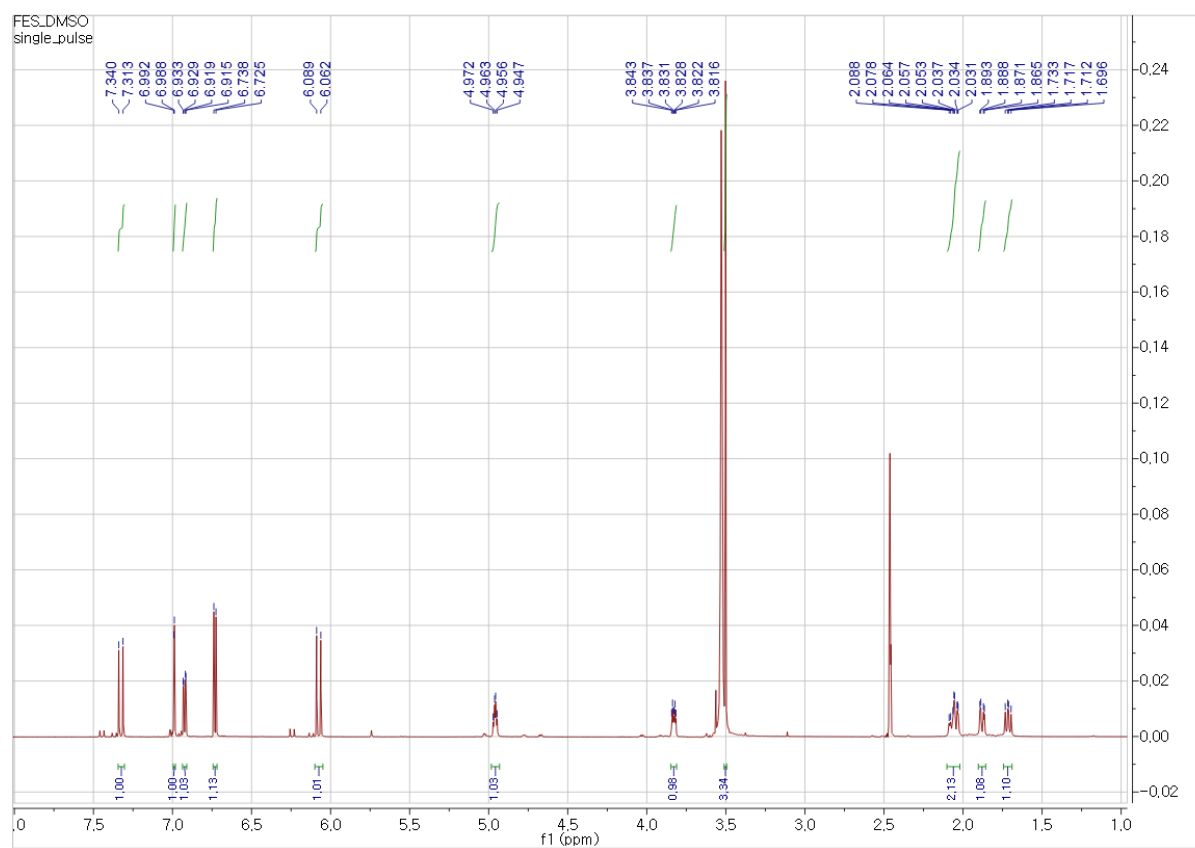Figure S5-1:  $^1\text{H}$ -NMR spectrum of compound **5** (600 MHz, DMSO- $\text{D}_2\text{O}$ )

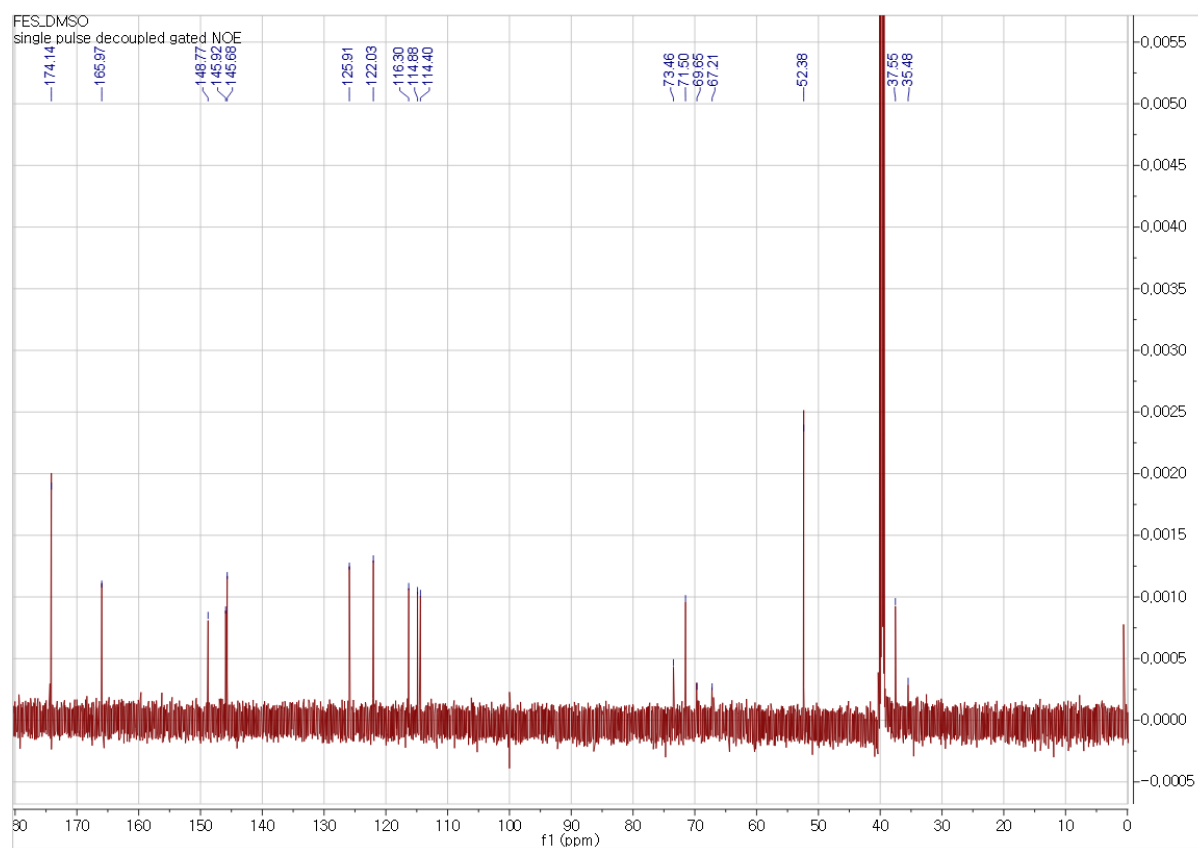Figure S5-2:  $^1\text{H}$ -NMR spectrum of compound **5** (150 MHz, DMSO+D<sub>2</sub>O)36  
37  
38

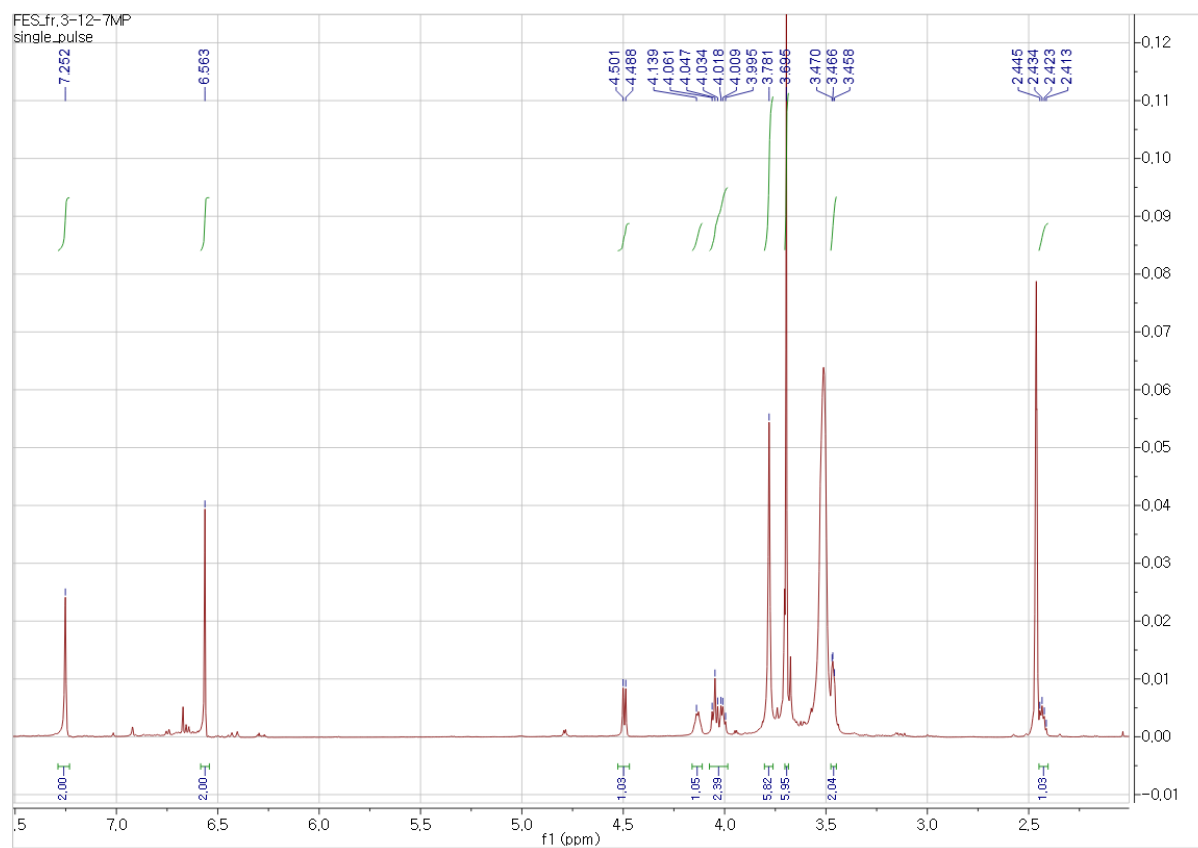

39  
40  
41

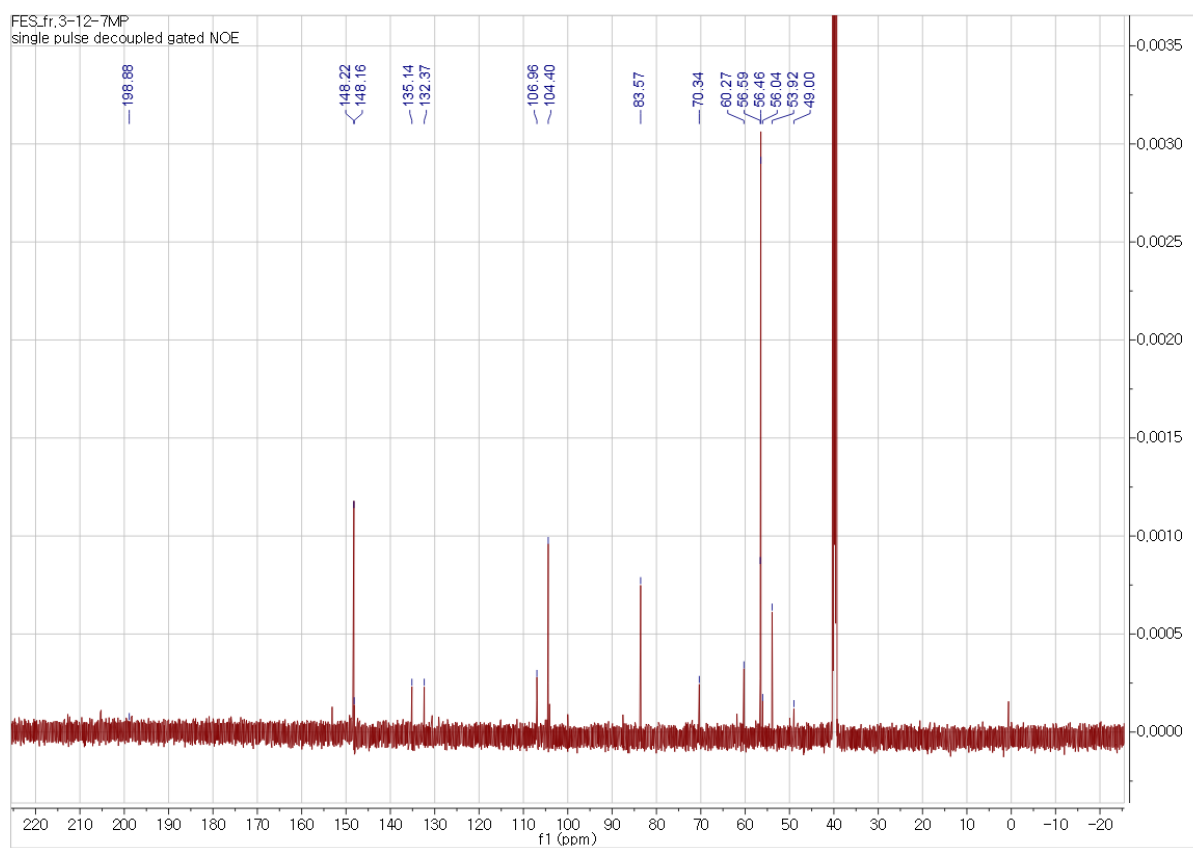

Figure S6-2:  $^1\text{H}$ -NMR spectrum of compound **6** (150 MHz, DMSO+D<sub>2</sub>O)

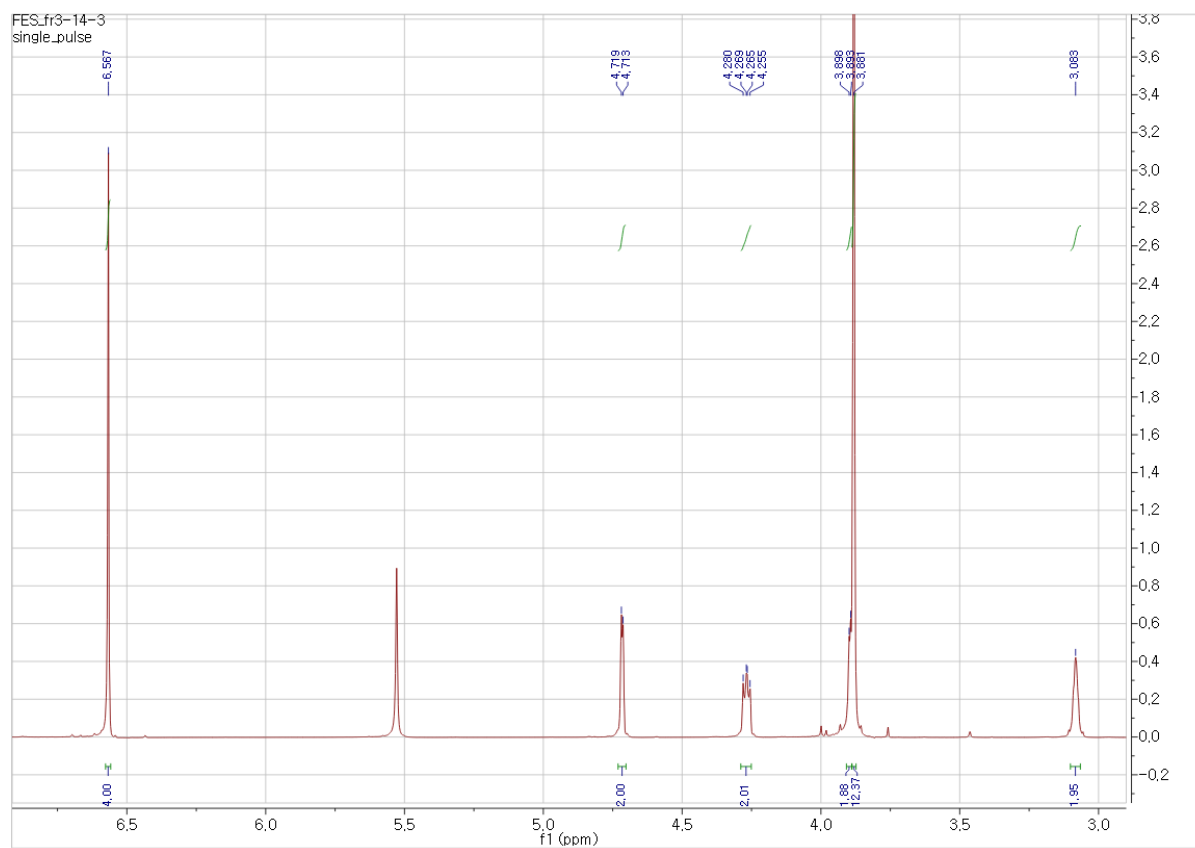Figure S7-1:  $^1\text{H}$ -NMR spectrum of compound **7** (600 MHz,  $\text{CDCl}_3$ )

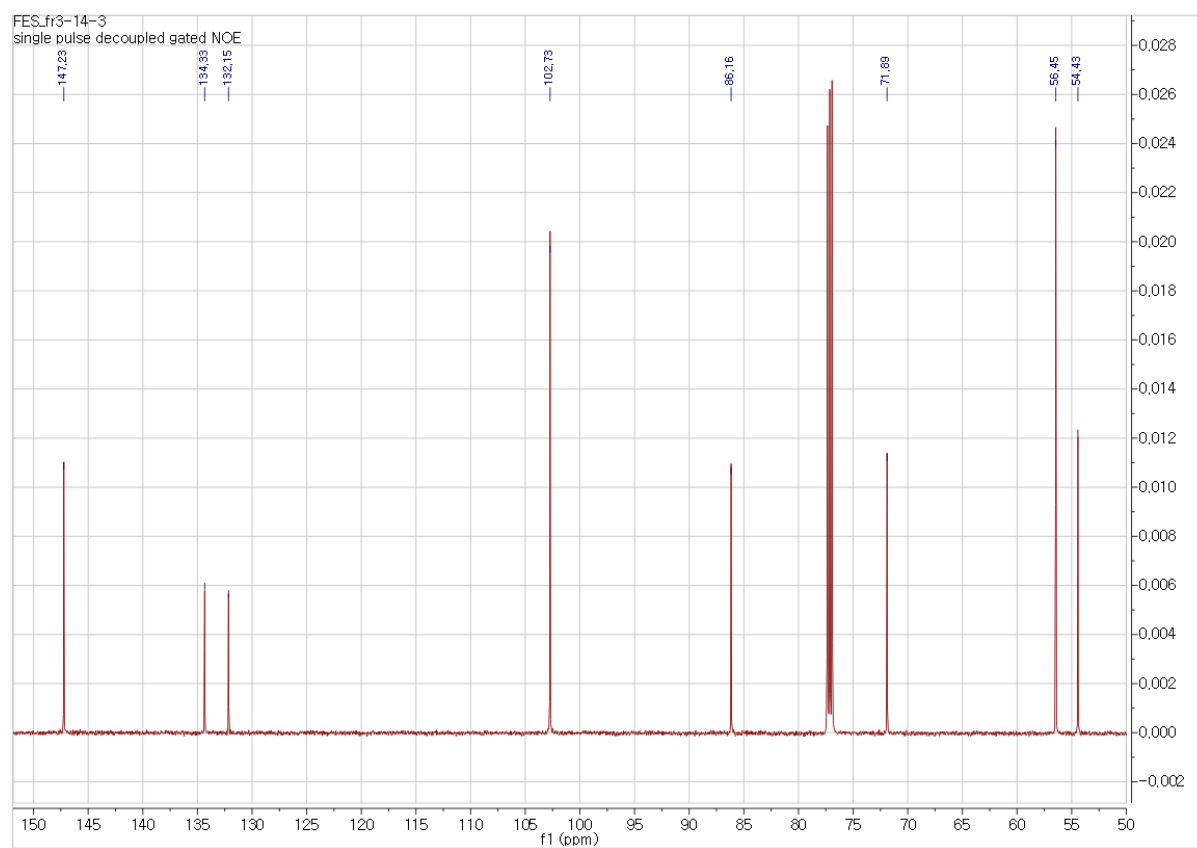

Figure S7-2:  $^{13}\text{C}$ -NMR spectrum of compound **7** (600 MHz,  $\text{CDCl}_3$ )

48  
49  
50

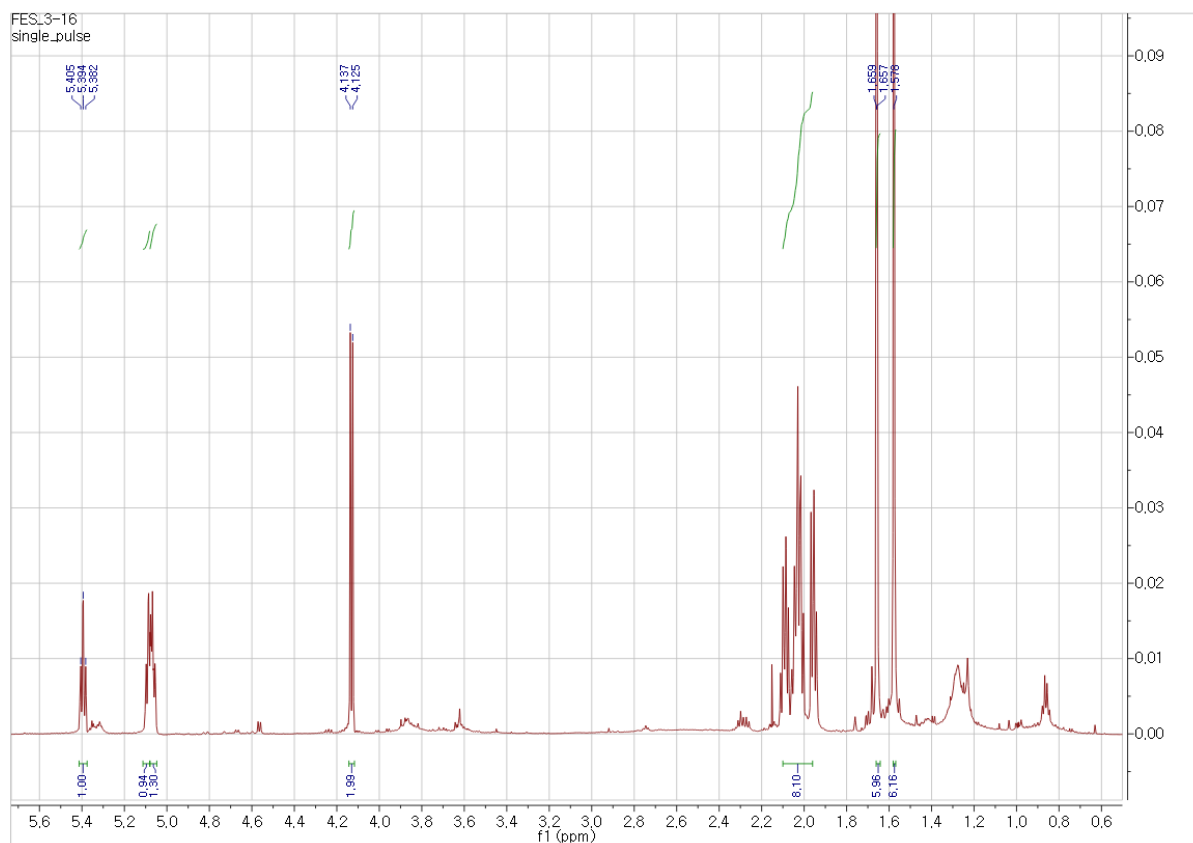Figure S8-1:  $^1\text{H}$ -NMR spectrum of compound **8** (600 MHz,  $\text{CDCl}_3$ )

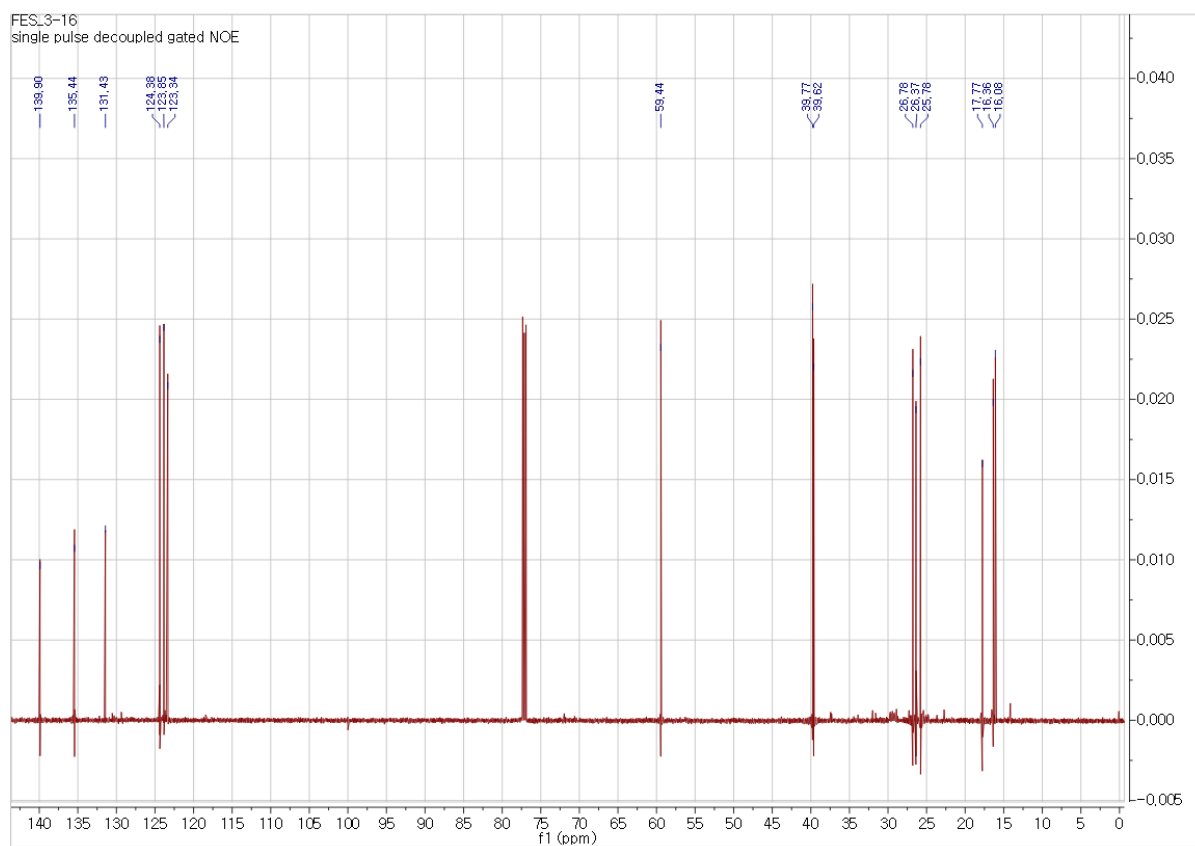Figure S8-2:  $^{13}\text{C}$ -NMR spectrum of compound **8** (150 MHz,  $\text{CDCl}_3$ )54  
55  
56



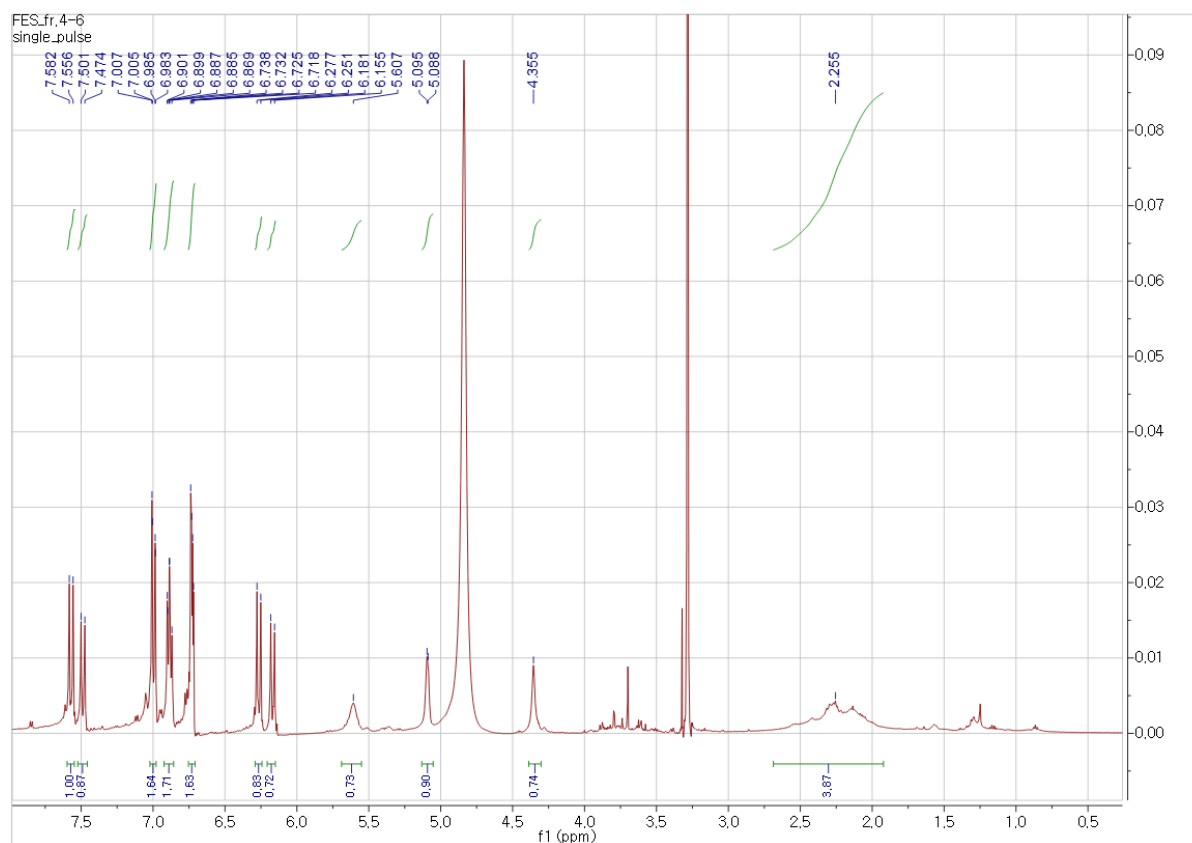Figure S9-1:  $^1\text{H}$ -NMR spectrum of compound **9** (600 MHz,  $\text{CD}_3\text{OD}+\text{D}_2\text{O}$ )

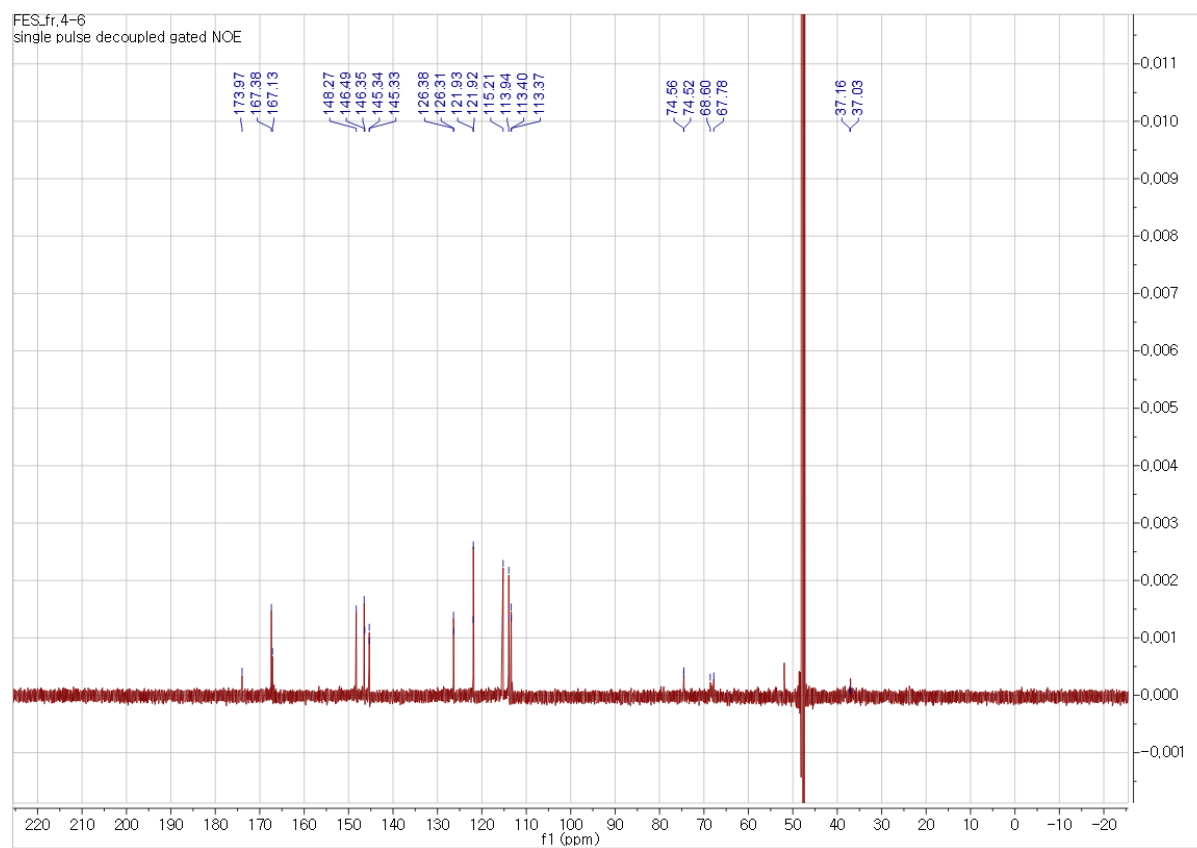

Figure S9-2:  $^{13}\text{C}$ -NMR spectrum of compound **9** (150 MHz,  $\text{CD}_3\text{OD}+\text{D}_2\text{O}$ )

60  
61  
62

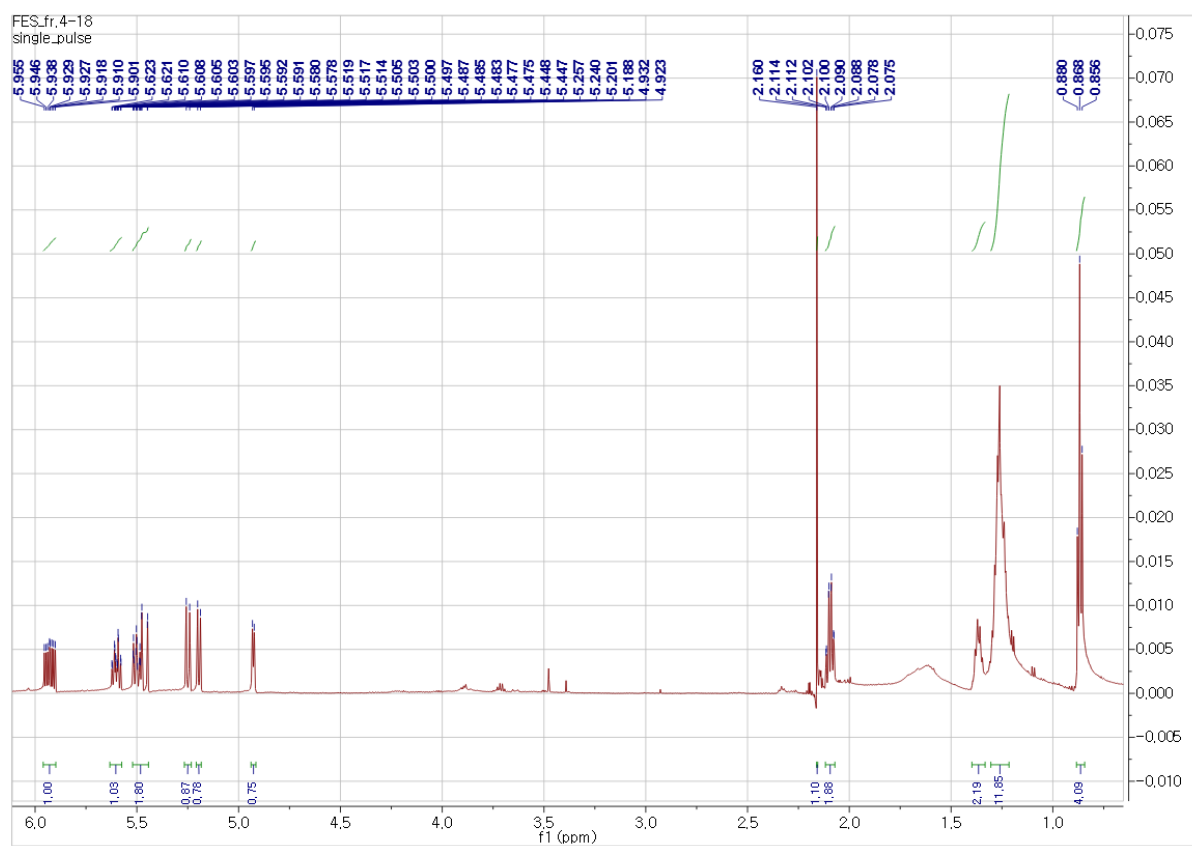Figure S10-1:  $^1\text{H}$ -NMR spectrum of compound **10** (600 MHz,  $\text{CDCl}_3$ )

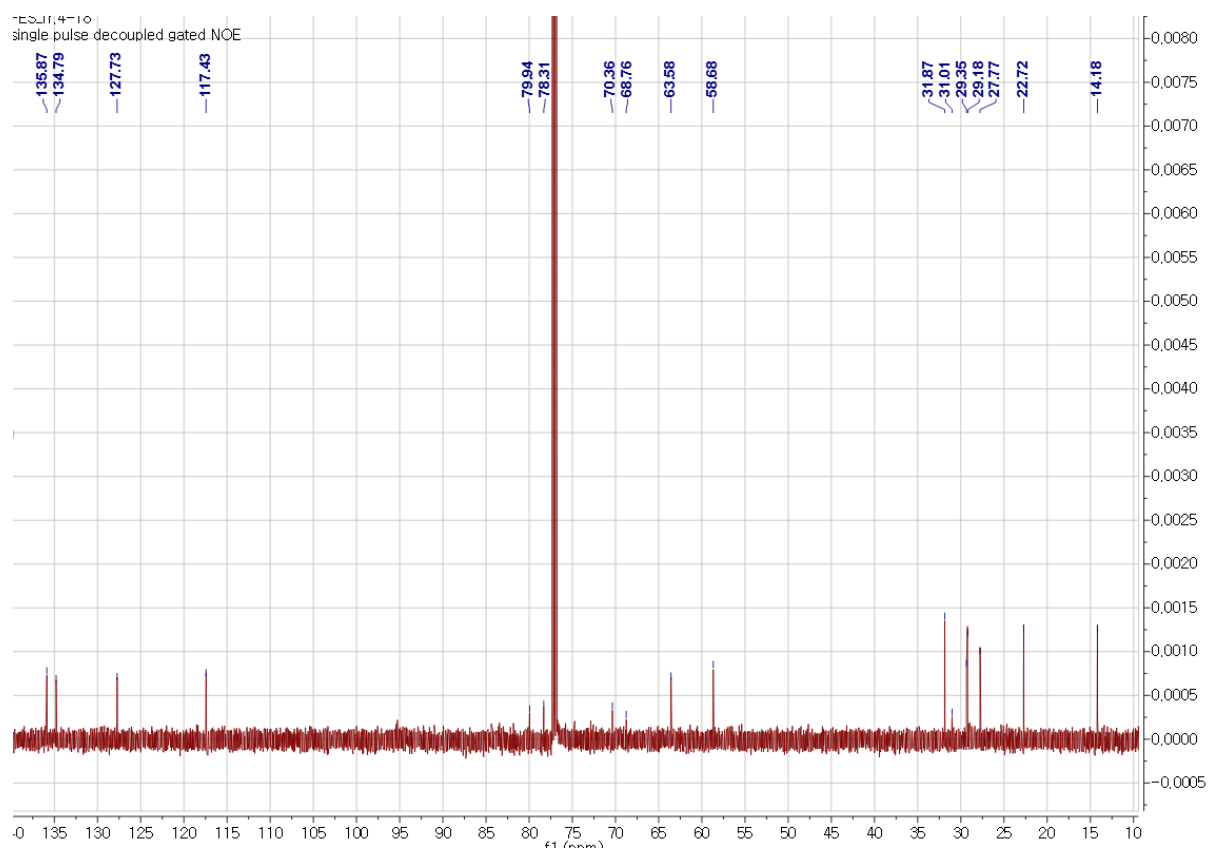Figure S10-2: <sup>13</sup>C-NMR spectrum of compound **10** (150 MHz, CDCl<sub>3</sub>)66  
67
